# Supplementary material
Source: PubMed Central journal article supplement (PMC4109283)
Supplement: NIHMS509993-supplement-01.pdf [file NIHMS509993-supplement-01.pdf]

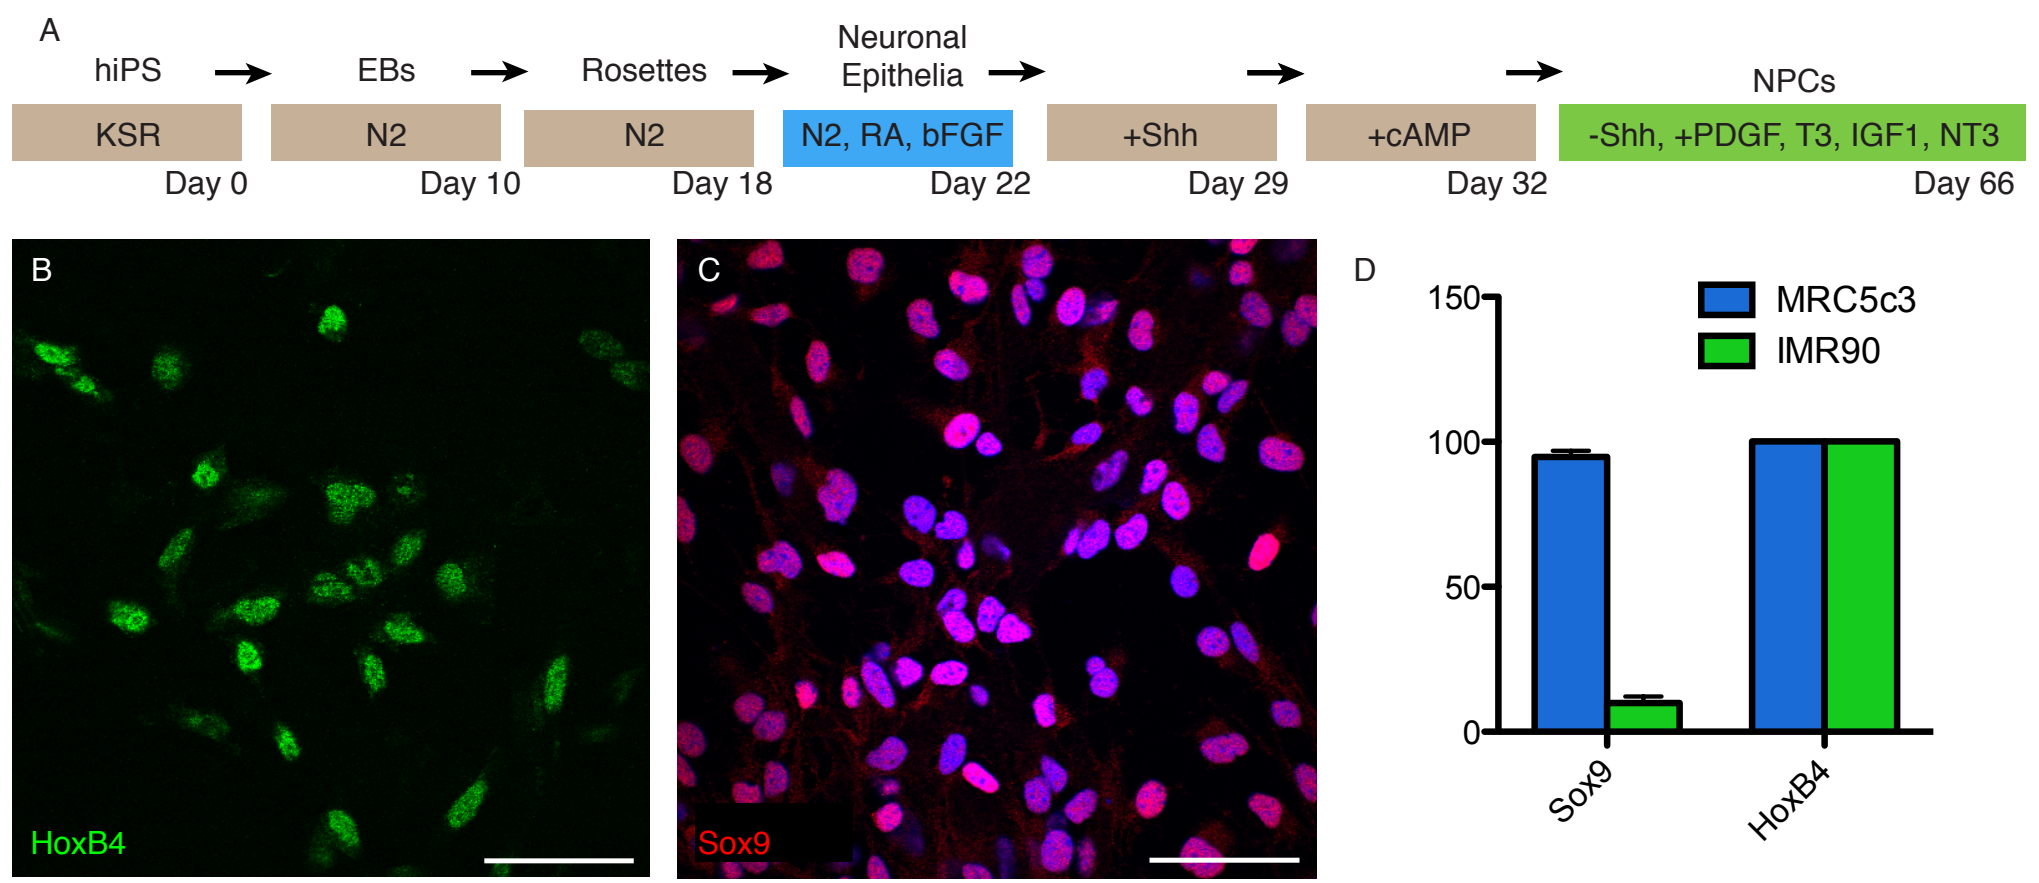

**Figure S1**  
 hiPSCs form region-specific neural progenitor cells (A) Outline of differentiation protocol. MRC5c3 hiPSCs (blue) were induced to form neural rosettes, while IMR90 hiPSCs (green) were further differentiated down a progenitor lineage for transplantation. (B)(C) At a neuronal epithelia stage, MRC5c3 hiPSC-NSCs uniformly expressed the hindbrain homeobox gene HoxB4 (B) and the neural stem cell marker Sox9 (C). (D) Quantification of HoxB4 and Sox9 in caudalized IMR90 hiPSC-NPCs and MRC5c3 NSCs. Scale bars = 50 $\mu$ m.
